# Supplementary material for: Assessment of Postpartum Depression Screening Practice and Associated Factors among Physicians in Gynecology and Obstetrics Department of Tertiary Hospitals in Southern and Central Ethiopia
Source: Research Square preprint supplement (doi:10.21203/rs.3.rs-4278746/v1), 2024-04-24
Supplement: Supplementary file 1 [file 40c2786c94e10f56d609155f.docx]

# ANNEX 1: KI INTERVIEW GUIDE

A greeting, my name is Dr. Amanuel Admasu. I am from Wolaita Sodo Comprehensive Specialized University Hospital. I would like to know more about the current practice, barriers to and enablers of postpartum depression screening practice. Is that okay?

Participant’s age_______________________________

Participant’s education level_______________________

Participant’s Occupation__________________________

Participant’s religion_____________________________

Interview time and date__________________________

1. Please tell me what you know about postpartum depression and PPD screening?

**Probe:** symptom/sign of PPD, risk factors, how to prevent/ treatment of PPD, screening tools for PPD

**_______________________________________________________________________________________________________________________________________________________________________________________________________________**

1. Please tell me the current PPD screening practice; How it’s practiced in health care facilities specifically in tertiary hospitals? **Probe:** Who? When? How?

**_______________________________________________________________________________________________________________________________________________________________________________________________________________**

1. Please tell me the barriers to screen postpartum mothers for PPD?

**Probe:** health care system barriers: availability of working guideline, screening tools availability, convenience of the place, time (patient load), training need.

**_______________________________________________________________________________________________________________________________________________________________________________________________________________**

Sociocultural barriers: language, community perception about PPD

**_______________________________________________________________________________________________________________________________________________________________________________________________________________**

1. What are the enablers of screening postpartum mothers for PPD?

**_______________________________________________________________________________________________________________________________________________________________________________________________________________**

1. Is there anything else you will like to add/say? **____________________________________________________________________________________________________________________________________________________________________________________________________________**

# ANNEX 2: QUESTIONNAIRE

1. Information sheet

Hello, my name is Dr. Amanuel Admasu I am conducting a study on the assessment of the postpartum depression screening practice and associated factors among physicians in obstetrics & gynecology departments in tertiary hospitals in SNNPRS, Ethiopia. The study aims to determine the level of PPD screening practice and associated factors among obstetrics and gynecology department physicians. You have been chosen to participate in the study. Your participation in the study is completely voluntary. For the self-administered questionnaire, we don’t need your real name or address; your name will not be used in any presentations of the study results. I would like to assure you that everything you are about to tell remains strictly confidential. You may refuse to answer any of the questions and choose not to participate or withdraw at any time you like if you are not willing to participate. However, it is hoped that your participation and genuine responses are more helpful for the completeness of this work. As a result, I kindly request you to participate in our study. The questionnaire will take approximately 20 minutes. Are you willing to participate in our study? Thank you for your cooperation!!!

**Questionnaire Google Form link:** [**https://docs.google.com/forms/d/1sh_X0VOOLCdvM3gTkosXwVHOMasUfN_6I_8xCVigh6Y**](https://docs.google.com/forms/d/1sh_X0VOOLCdvM3gTkosXwVHOMasUfN_6I_8xCVigh6Y)

**Institution Name ---------------------------------------------------------**

**Part 1: Socio-Demographic Characteristics of the health care professionals**

| **Q. No** | **Questions** | **Answers/ choices for respondent** | Skip |
| --- | --- | --- | --- |
| 1. | Age of the respondent | __________year |  |
| 2. | Sex of the respondent | 1. Male 2. Female |  |
| 3. | Religion | 1. Orthodox 2. Muslim 3. Catholic 4. Protestant 5. Other |  |
| 4. | Marital status | 1. Single 2. Married 3. Separated 4. Widowed |  |
| 5. | Number of children | __________________ |  |
| 6. | Level of education | 1. Bachelor’s degree 2. Master’s degree and above |  |

**Part 2: Health care provider related factor**

**Part 2.1: Professional experience, personal experience of postpartum depression, and language skill**

| S. No | **Questions** | **Answers/ choices for respondent** | Skip |
| --- | --- | --- | --- |
| 7. | Duration of working experience in your profession. | _________________ |  |
| 8. | Profession type | 1. GP 2. OB-GYN Resident 3. OB-GYN Senior |  |
| 9. | Do you have Personal experience (other than patients) with Postpartum depression (POSTPARTUM DEPRESSION) | 1. Yes 2. No |  |
| 10. | If **“Yes for Q 9”** how was your experience? “**Multiple responses are allowed”** | 1. Self-postpartum depression 2. Through a friend postpartum depression 3. Family-postpartum depression |  |
| 11. | Can you speak the local language? | 1. Yes 2. No |  |

**Part 2.2** **Knowledge of The Health care professionals Toward Postpartum Depression**

**2.2.1 General Knowledge of** **Postpartum Depression**

| **S. No** | | **Questions** | **Response** |
| --- | --- | --- | --- |
| 12 | | Have you ever heard about POSTPARTUM DEPRESSION? | 1. Yes 2. No |
| 13 | | **If “YES” for Q12)** Where did you get the information?  (Sources of information about POSTPARTUM DEPRESSION)  **Multiple responses are allowed”** | 1. During school 2. In-service training 3. Workshops 4. Personal learning 5. Work experience |
| 14 | | POSTPARTUM DEPRESSION can occur any time during the 1st year post delivery | 1. Yes 2. No 3. I don’t know |
| 15 | | POSTPARTUM DEPRESSION only affects females, not males | 1. Yes 2. No 3. I don’t know |
| 16 | | POSTPARTUM DEPRESSION affects 10% -20% of mothers | 1. Yes 2. No 3. I don’t know |
| 17 | | Depression in postpartum blues lasts >2 weeks after delivery | 1. Yes 2. No 3. I don’t know |
| 18 | | POSTPARTUM DEPRESSION most commonly occurs during the 1st to 3rd month after delivery | 1. Yes 2. No 3. I don’t know |
| 19 | | POSTPARTUM DEPRESSION is one of the leading causes of infanticide | 1. Yes 2. No 3. I don’t know |
| 20 | | Mothers with POSTPARTUM DEPRESSION may default their infants’ follow-up for vaccination | 1. Yes 2. No 3. I don’t know |
| 21 | | POSTPARTUM DEPRESSION affects the child’s physical and mental development | 1. Yes 2. No 3. I don’t know |
| 22 | | Mothers not treated for PPD may remain depressed after 1 year | 1. Yes 2. No 3. I don’t know |
| 23 | | All mothers with POSTPARTUM DEPRESSION need antidepressants | 1. Yes 2. No 3. I don’t know |
| 24 | | Antidepressant is contraindicated for breastfeeding mother | 1. Yes 2. No 3. I don’t know |
| 25 | | Electroconvulsive therapy can be used in treating POSTPARTUM DEPRESSION | 1. Yes 2. No 3. I don’t know |
| 26 | | Supportive counseling is recommended for mild postpartum depression | 1. Yes 2. No 3. I don’t know |
| **2.2.2 Are these the risk factors for POSTPARTUM DEPRESSION?** | | | |
| 27 | Primigravidity | | 1. Yes 2. No 3. I don’t know |
| 28 | Planned pregnancy | | 1. Yes 2. No 3. I don’t know |
| 29 | Taking methyldopa | | 1. Yes 2. No 3. I don’t know |
| 30 | Family history of psychiatric illness | | 1. Yes 2. No 3. I don’t know |
| 31 | History of POSTPARTUM DEPRESSION in a previous pregnancy | | 1. Yes 2. No 3. I don’t know |
|  |

| **2.2.3 Are these the symptoms of POSTPARTUM DEPRESSION** | | |
| --- | --- | --- |
| 32 | Difficulty in sleeping | 1. Yes 2. No 3. I don’t know |
| 33 | Self-blaming when things went wrong | 1. Yes 2. No 3. I don’t know |
| 34 | Weight loss | 1. Yes 2. No 3. I don’t know |
| 35 | Suicidal thought | 1. Yes 2. No 3. I don’t know |
| 36 | Tired or no energy | 1. Yes 2. No 3. I don’t know |
| 37 | Anxious or worried for no good reason | 1. Yes 2. No 3. I don’t know |

**Part: 2.2.4 Knowledge of the health care professionals toward POSTPARTUM DEPRESSION screening**

| 38 | Are you aware of any screening tools for POSTPARTUM DEPRESSION? | 1. Yes 2. No |
| --- | --- | --- |
| 39 | If **“Yes” for Q 38** Which one?  **Multiple responses are allowed”** | 1. WHO two-question screening method 2. EPDS Edinburgh Postpartum Depression Scale 3. POSTPARTUM DEPRESSIONS Postpartum Depression Screening Scale 4. PRQ Pregnancy Risk Questionnaire 5. BDI Beck Depression Inventory-I and II 6. PHQ Patient Health Questionnaire |

**Part 2.3:** **Attitude of health care professionals on the screening of postpartum depression**

| **S. No** | **Question** | | **Strongly disagree** | | **Disagree** | | **Neutral** | | **Agree** | | **Strongly agree** | |
| --- | --- | --- | --- | --- | --- | --- | --- | --- | --- | --- | --- | --- |
| 40 | | POSTPARTUM DEPRESSION is a social stigma |  | |  | |  | |  | |  | |
| 41 | | It is our culture that mothers do not discuss their depression with their attending |  | |  | |  | |  | |  | |
| 42 | | Attending Mothers with POSTPARTUM DEPRESSION prefer to seek alternative treatment for their depression. |  | |  | |  | |  | |  | |
| 43 | | Screening for POSTPARTUM DEPRESSION is necessary |  | |  | |  | |  | |  | |
| 44 | | Screening for POSTPARTUM DEPRESSION takes too much time |  | |  | |  | |  | |  | |
| 45 | | Screening for POSTPARTUM DEPRESSION is my responsibility |  | |  | |  | |  | |  | |
| 46 | | screening results in early diagnosis and treatment |  | |  | |  | |  | |  | |
| 47 | | Giving counseling to mothers with POSTPARTUM DEPRESSION is not my responsibility |  | |  | |  | |  | |  | |
| 48 | | Referring mothers with POSTPARTUM DEPRESSION for further treatment is my responsibility |  | |  | |  | |  | |  | |
| 49 | | It is depressing to care for mothers with POSTPARTUM DEPRESSION |  | |  | |  | |  | |  | |
| 50 | | I am comfortable talking with postpartum mothers about depression |  | |  | |  | |  | |  | |

**Part 3: Health facility-related factors for POSTPARTUM DEPRESSION screening practice**

| 51 | Is there a training program in Postpartum depression (POSTPARTUM DEPRESSION) and POSTPARTUM DEPRESSION screening in your institution? | 1. Yes 2. No |  |
| --- | --- | --- | --- |
| 52 | If **Yes for Q 51** What was the content of the training?  **“Multiple responses are allowed”** | 1. POSTPARTUM DEPRESSION screening tools 2. POSTPARTUM DEPRESSION diagnosis criteria 3. POSTPARTUM DEPRESSION risk factors 4. POSTPARTUM DEPRESSION treatment options |  |
| 53 | Are standardized screening tools available in your setting? (*i.e.,* printed standard screening tool available in postpartum follow-up clinics and post-natal wards) | 1. Yes 2. No |  |

**Part 4: Postpartum screening practice of healthcare provider**

| 54 | Have you ever screened for POSTPARTUM DEPRESSION? | 1. Yes 2. No →**If “NO” go to** Q **66** |  |
| --- | --- | --- | --- |
| 55 | If **“Yes” for Q 54**, When do you usually screen mothers for POSTPARTUM DEPRESSION**? “Multiple responses are allowed”** | 1. Antepartum 2. Intrapartum 3. Immediate postpartum (days after delivery 4. Postpartum (weeks after delivery) >6‑8 weeks after delivery |  |
| 56 | How often do you screen postpartum mothers for depression? | 1. Never 2. Rarely 3. Often 4. Always |  |
| 57 | How often do you screen for POSTPARTUM DEPRESSION when risk factors are present? | 1. Never 2. Rarely 3. Often 4. Always |  |
| 58 | The method used to screen for POSTPARTUM DEPRESSION | 1. Taking a good history & observation 2. Using a standard screening tool |  |
| 59 | Which type of screening tool have you ever used? **“Multiple responses are allowed”** | 1. WHO two-question screening method 2. EPDS Edinburgh Postpartum Depression Scale 3. POSTPARTUM DEPRESSIONS Postpartum Depression Screening Scale 4. PRQ Pregnancy Risk Questionnaire 5. BDI Beck Depression Inventory-II 6. PHQ Patient Health Questionnaire |  |
| 60 | How frequently do you use the available screening tools for POSTPARTUM DEPRESSION? | 1. Never 2. Rarely 3. Often 4. Always |  |
| 61 | Do you educate mothers on the signs and symptoms of POSTPARTUM DEPRESSION during antenatal and postnatal visits? | 1. Never 2. Rarely 3. Often 4. Always |  |
| 62 | Do you Advise mothers to report signs and symptoms of POSTPARTUM DEPRESSION when they realize any after delivery? | 1. Never 2. Rarely 3. Often 4. Always |  |
| 63 | Have you ever identified a woman with POSTPARTUM DEPRESSION? | 1. Yes 2. No |  |
| 64 | When a woman is identified to have POSTPARTUM DEPRESSION, how frequently do you give her counseling? | 1. Never 2. Rarely 3. Often 4. Always |  |
| 65 | When a woman is identified to have POSTPARTUM DEPRESSION, do you refer her for further treatment? | 1. Never 2. Rarely 3. Often 4. Always |  |
| 66 | **If “NO” for Q 54, w**hat is the reason for not screening POSTPARTUM DEPRESSION? **Multiple responses are allowed”** | 1. Time constraints 2. Lack of training 3. Low knowledge of diagnostic criteria 4. Patient unwillingness to accept medication 5. Patient unwillingness to receive counseling 6. Patient unwillingness to accept the diagnosis 7. Low knowledge of treatment options 8. Low prevalence rates 9. Lack of continuity of care due to the relatively high number of midwives working part-time 10. Shorter length of hospital stays, 11. The impact of additional people in the environment (visitors for example) |  |

**Thank you!**
